# Supplementary material for: Catalytic Hydrogenation of γ-Butyrolactone to Butanediol over a High-Performance Cu-SiO2 Catalyst
Source: MDPI journal article supplement (doi:10.3390/catal14050297), 2024-04-29
Supplement: s1 [file s1]

# Supporting Information

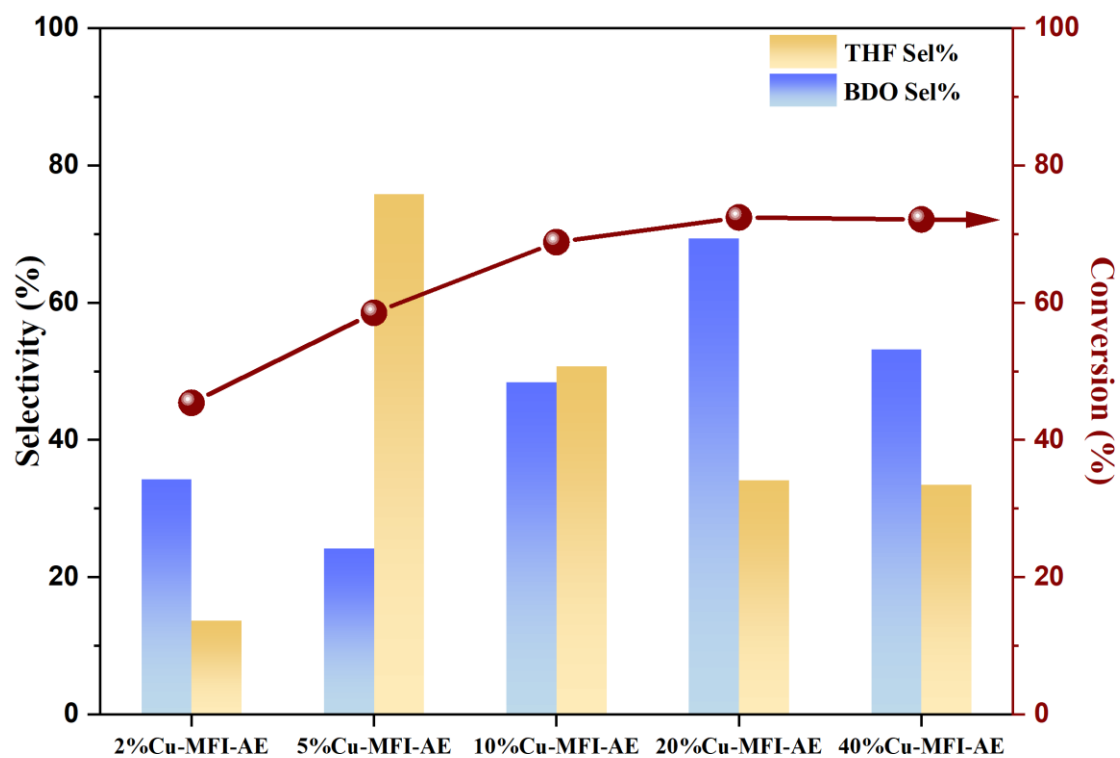

**Figure S1.** Catalytic performance of Cu-MFI-AE with different Cu loadings for GBL hydrogenation conversion to BDO (T=200 °C, 4MPa H<sub>2</sub>, 8 h)

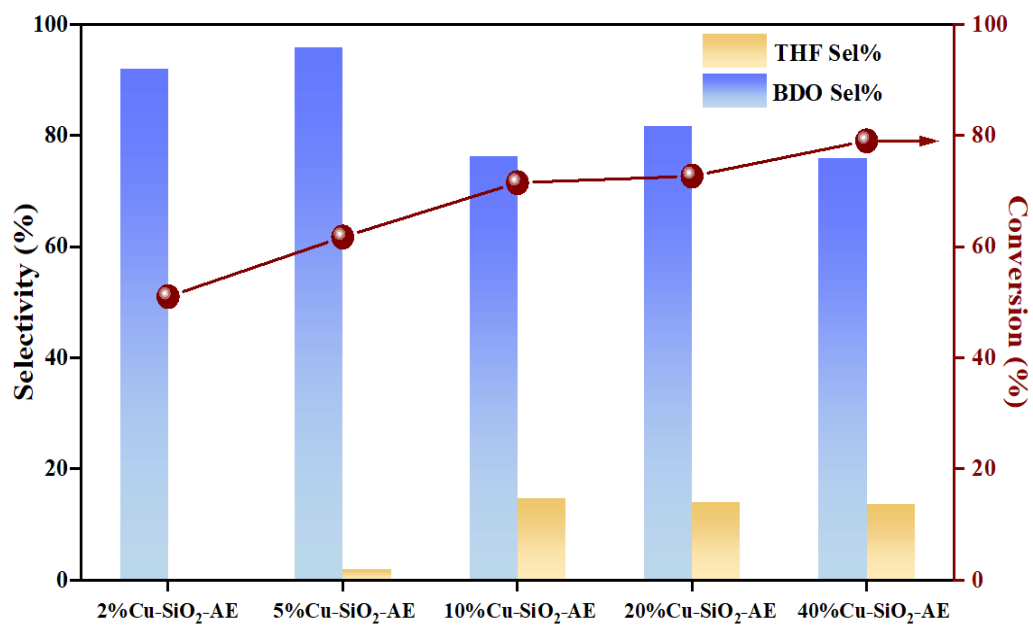

**Figure S2.** Catalytic performance of Cu-SiO<sub>2</sub>-AE catalysts with different Cu loadings for GBL hydrogenation conversion to BDO (T=200 °C, 4MPa H<sub>2</sub>, 8 h)

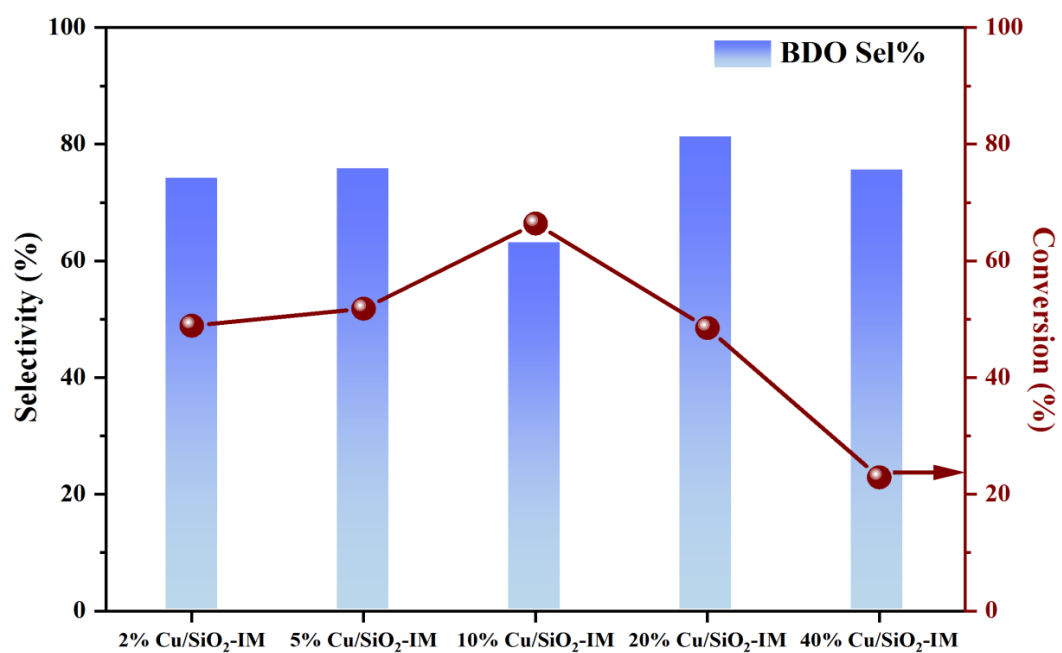

**Figure S3.** Catalytic performance of Cu/SiO<sub>2</sub>-IM catalysts with different Cu loadings for GBL hydrogenation conversion to BDO (T=200 °C, 4MPa H<sub>2</sub>, 8 h)

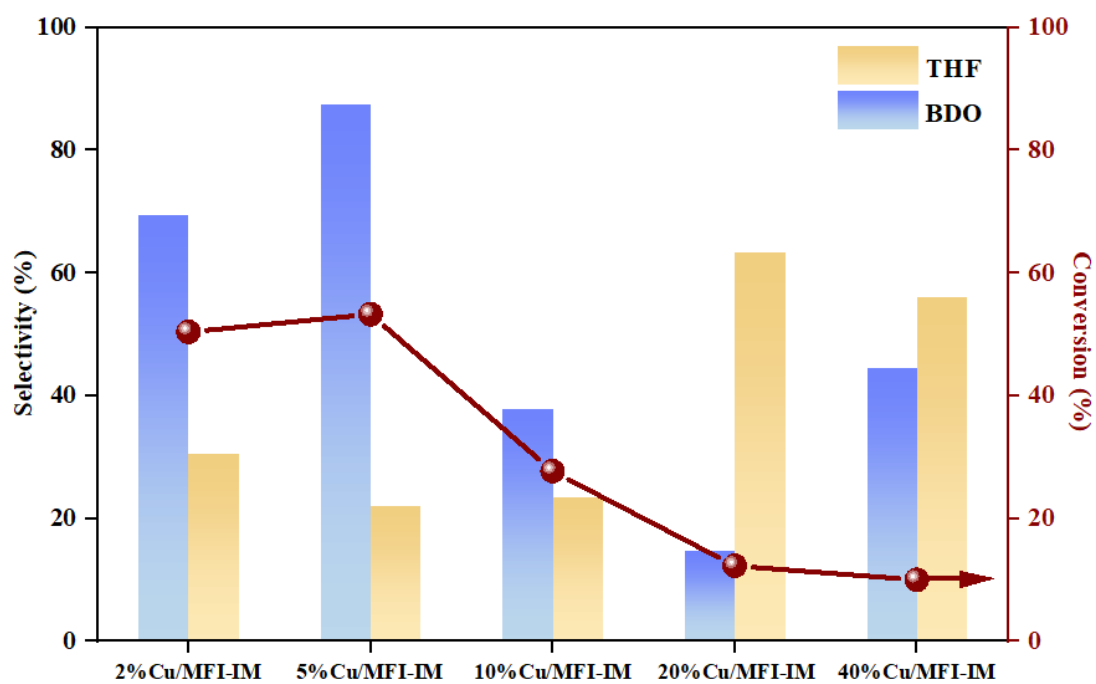

**Figure S4.** Catalytic performance of Cu/MFI-IM catalysts with different Cu loadings for GBL hydrogenation conversion to BDO (T=200 °C, 4MPa H<sub>2</sub>, 8 h)

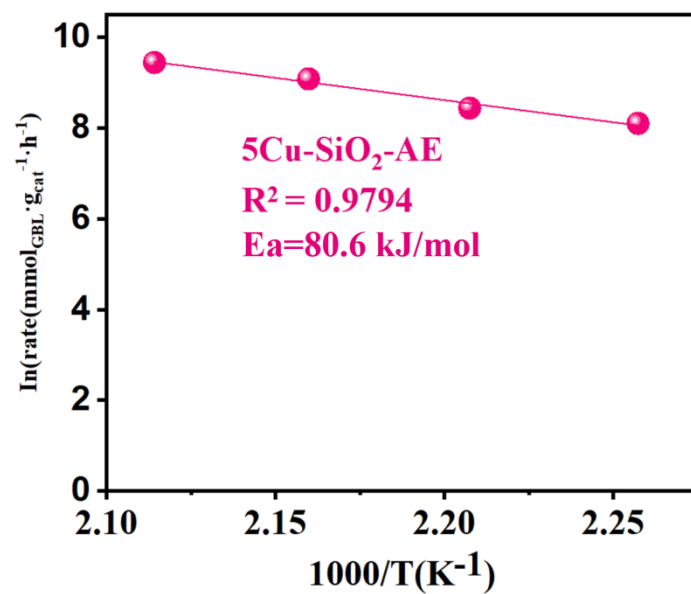

**Figure S5.** Arrhenius plots of GBL conversion over 5%Cu-SiO<sub>2</sub>-AE catalysts.

The reaction conditions: GBL 1.0 g, 1,4-dioxane 19.0 mL, catalyst 0.1 g, H<sub>2</sub> pressure 4.0 MPa, reaction time 30 minutes.

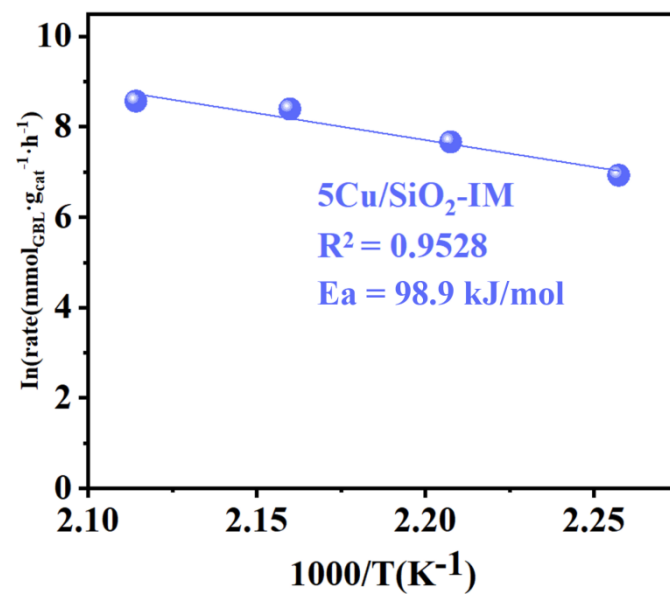

**Figure S6.** Arrhenius plots of GBL conversion over 5%Cu/SiO<sub>2</sub>-IM catalysts.

The reaction conditions: GBL 1.0 g, 1,4-dioxane 19.0 mL, catalyst 0.1 g, H<sub>2</sub> pressure 4.0 MPa, reaction time 30 minutes.

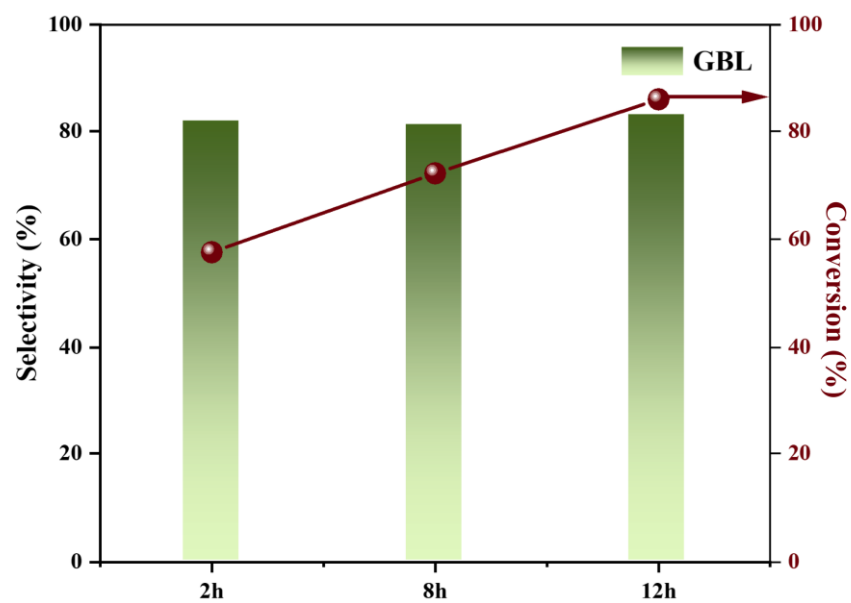

**Figure S7.** Catalytic performance of 5%Cu-SiO<sub>2</sub>-AE catalyst for BDO conversion at different time (T=180 °C, 2MPa N<sub>2</sub>)

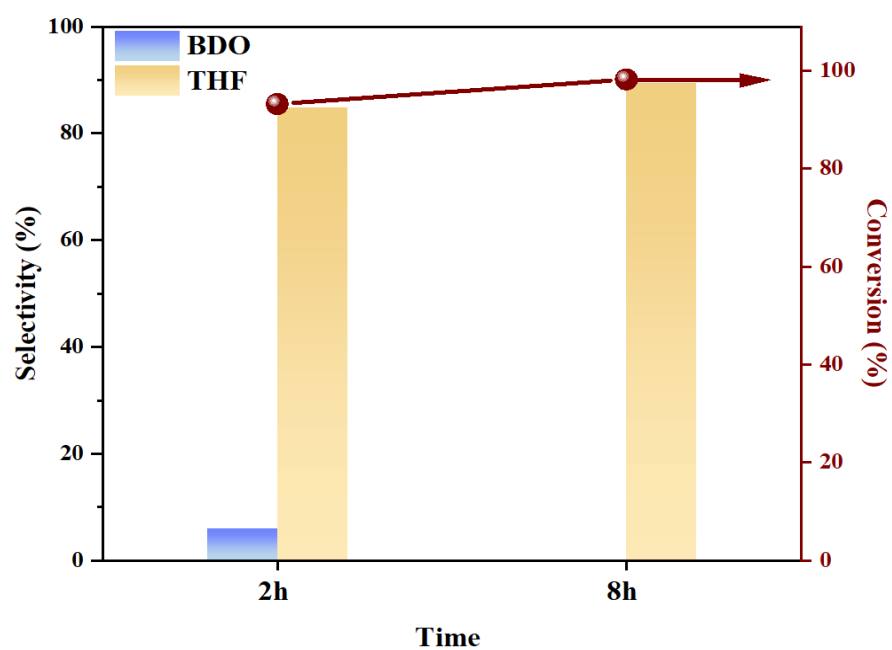

**Figure S8.** Catalytic performance of 5%Cu-MFI-AE catalyst for BDO conversion at different time  
(T=200 °C, 4MPa H<sub>2</sub>)



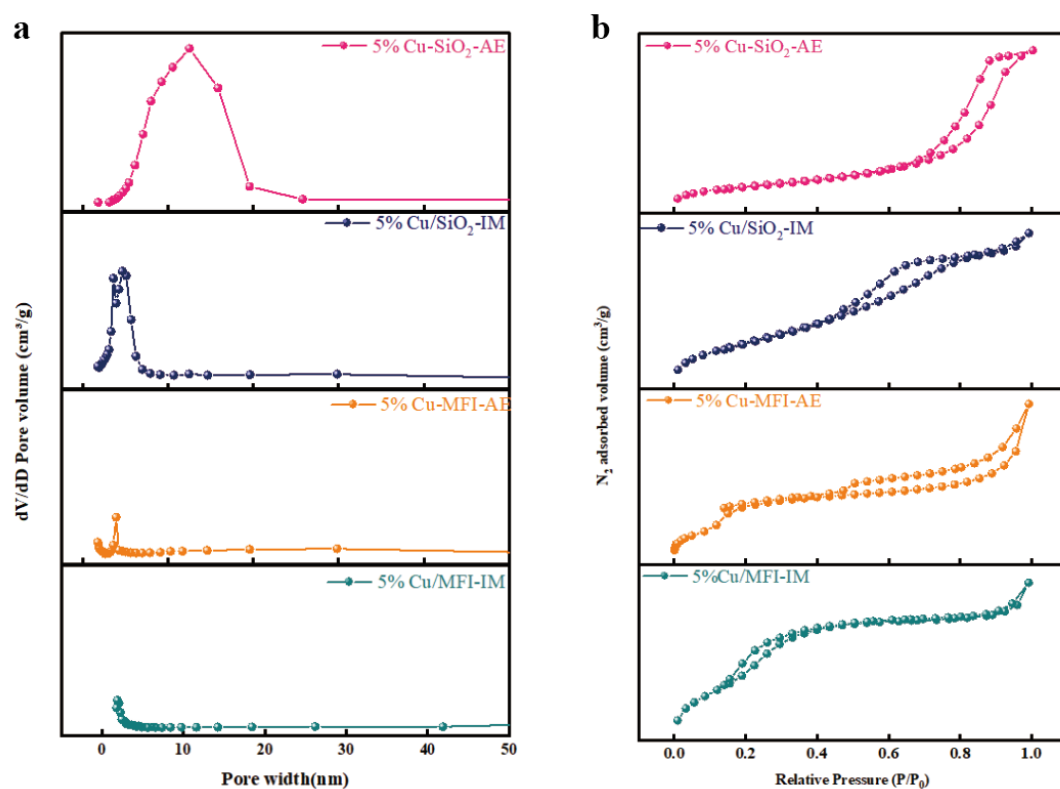

**Figure S9.**  $N_2$  adsorption–desorption isotherms (a) and the corresponding pore size distributions (b) for the typical Cu catalysts.

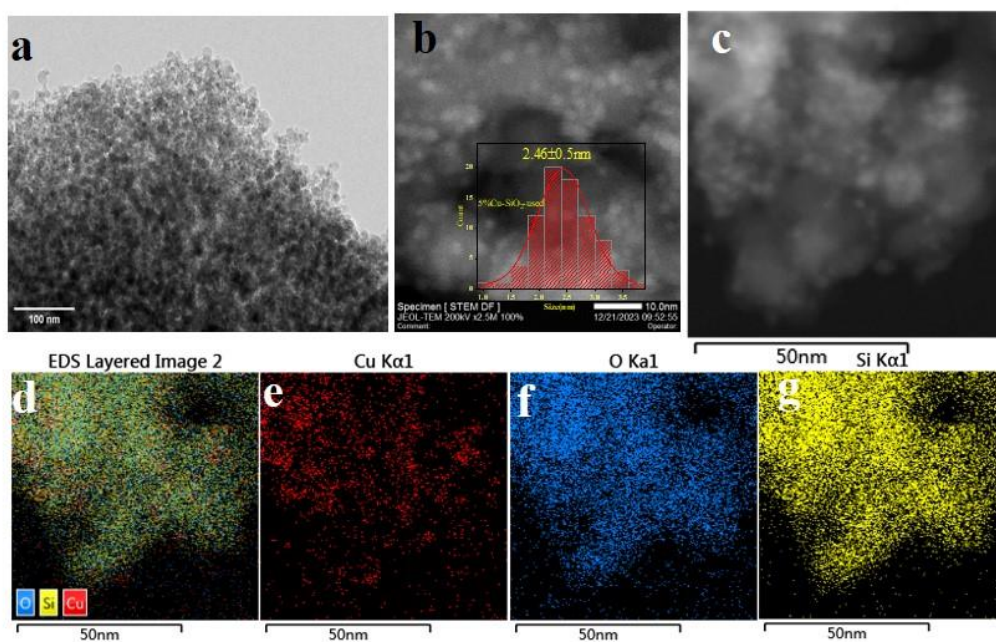

**Figure S10.** TEM image (a), HAADF-STEM images (b-c) and element mapping (d-g) of spent 5%Cu-SiO<sub>2</sub>-AE catalyst.

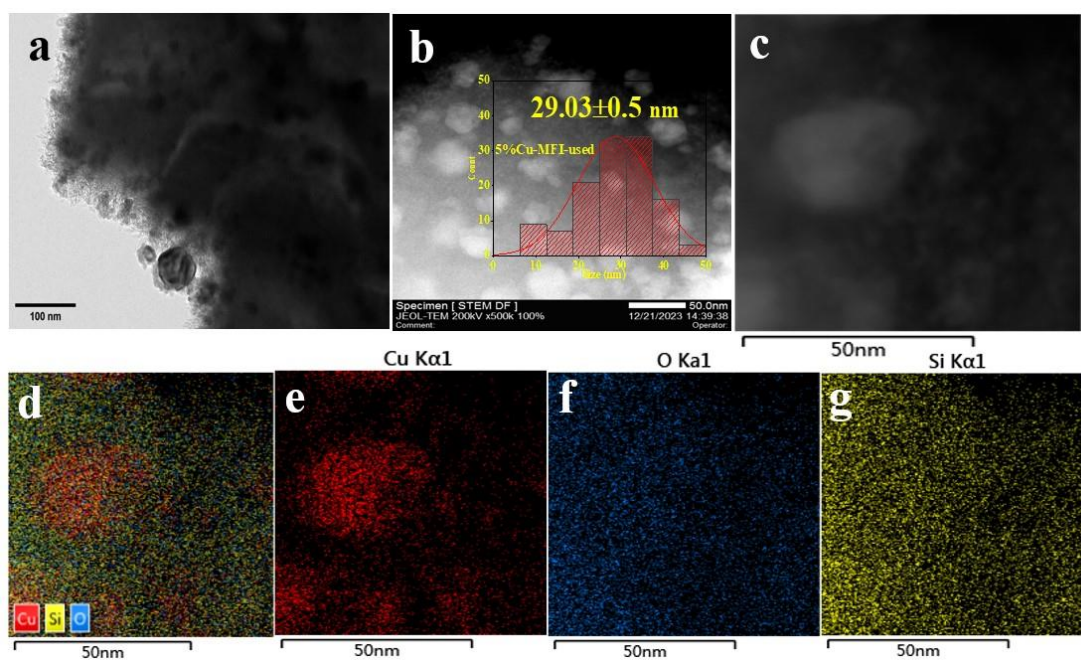

**Figure S11.** TEM image (a), HAADF-STEM images (b-c) and element mapping (d-g) of spent 5%Cu-MFI-AE catalyst.

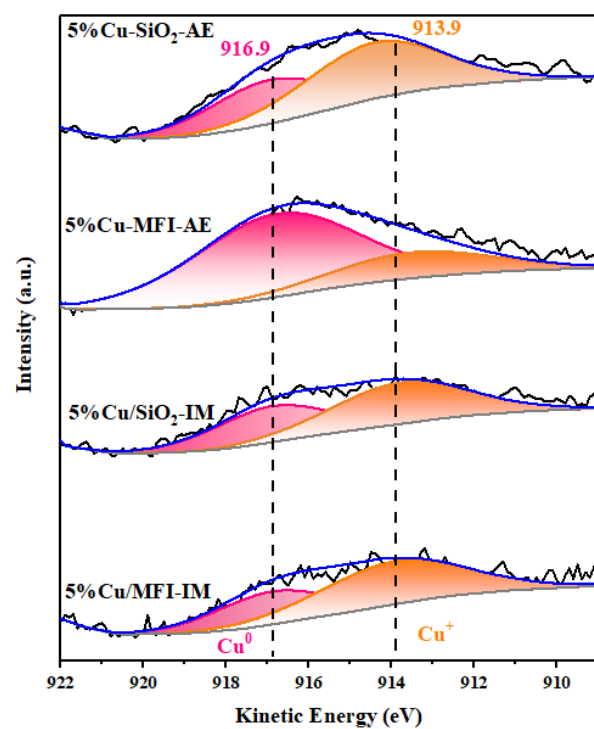

**Figure S12.** Cu LMM XPS spectra of the typical Cu catalysts.

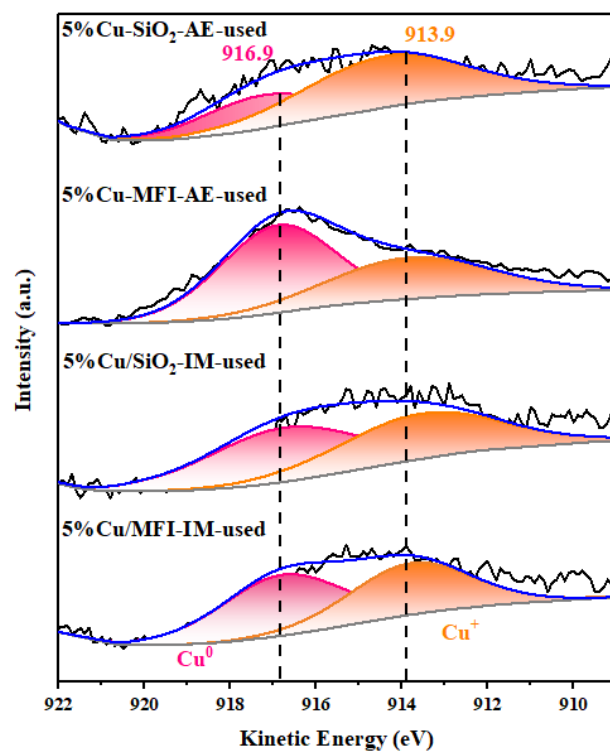

**Figure S13.** Cu LMM XPS spectra of the spent typical Cu catalysts.

**Table S1.** Catalytic performance of 5%Pd/C and 5%Ru/C. Reaction conditions: T=200 °C, 4 MPaH<sub>2</sub>, 8 h

| Entry | Catalyst | GBL Con. % | Sel. % |        |
|-------|----------|------------|--------|--------|
|       |          |            | BDO    | THF    |
|       |          |            | Sel. % | Sel. % |
| 1     | 5%Pd/C   | 0          | 0      | 0      |
| 2     | 5%Ru/C   | 5.2        | 44.6   | 12.0   |

**Table S2.** Textural properties of the typical Cu-based catalysts.

| Entry | Catalyst                      | S <sub>BET</sub><br>(m <sup>2</sup> /g) | S <sub>micro</sub><br>(m <sup>2</sup> /g) | S <sub>ext</sub><br>(m <sup>2</sup> /g) | V <sub>micro</sub><br>(cm <sup>3</sup> /g) | V <sub>meso</sub><br>(cm <sup>3</sup> /g) | Average pore<br>(nm) |
|-------|-------------------------------|-----------------------------------------|-------------------------------------------|-----------------------------------------|--------------------------------------------|-------------------------------------------|----------------------|
| 1     | 5%Cu-SiO <sub>2</sub> -<br>AE | 261.0                                   | 7.9                                       | 253.0                                   | 0.002                                      | 0.683                                     | 10.1                 |
| 2     | 5%Cu/SiO <sub>2</sub> -<br>IM | 375.2                                   | 0                                         | 374.7                                   | 0                                          | 0.442                                     | 4.6                  |
| 3     | 5%Cu-MFI-<br>AE               | 347.8                                   | 116.8                                     | 230.9                                   | 0.064                                      | 0.138                                     | 6.8                  |
| 4     | 5%Cu/MFI-<br>IM               | 318.3                                   | 194.3                                     | 123.9                                   | 0.100                                      | 0.063                                     | 2.7                  |
